# Supplementary material for: Coefficient of Variation in Metastatic Lymph Nodes Determined by 18F-FDG PET/CT in Patients with Advanced NSCLC: Combination with Coefficient of Variation in Primary Tumors
Source: MDPI journal article supplement (doi:10.3390/cancers16020279), 2024-01-09
Supplement: s1 [file s1]

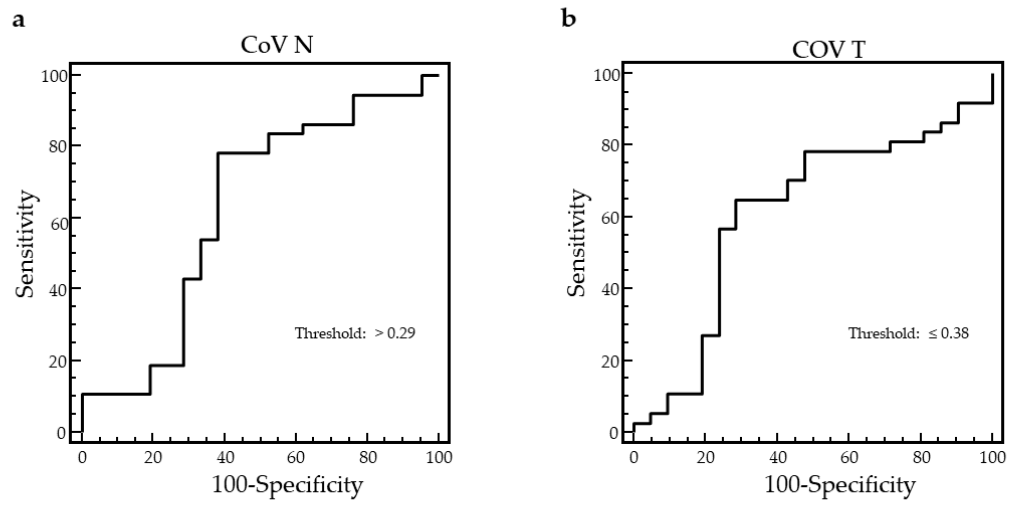

**Supplementary Figure S1:** ROC curves for CoV of metastatic lymph nodes (CoV N) and CoV of primary tumors (CoV T). ROC curve analysis showed that the best discriminative values for CoV N and CoV T between patients who had died and survivors were 0.29 (a) and 0.38 (b), respectively.
